# Supplementary material for: Inter-Individual Variability in Xenobiotic-Metabolizing Enzymes: Implications for Human Aging and Longevity
Source: PubMed Central journal article supplement (PMC6562959; doi:10.3390/genes10050403), 2019-05-27
Supplement: genes-10-00403-s001.pdf [file genes-10-00403-s001.pdf]

**Table S1.** List of genes and SNPs considered in the present study.

| XME            | Gene                   | SNP                    | Functional Consequence          | AA change            |
|----------------|------------------------|------------------------|---------------------------------|----------------------|
| Phase I        | <i>CYP2A6</i>          | rs28399433 - A/C       | 2KB Upstream Variant            |                      |
|                | <i>CYP2B6</i>          | rs3745274 - G/T        | Missense Variant                | Gln172His            |
|                | <i>CYP2E1</i>          | rs2070673 - T/A        | 2KB Upstream Variant            |                      |
|                | <i>CYP3A5</i>          | rs776746 - C/T         | Intron /Splice Acceptor Variant |                      |
|                | <i>CYP2C19</i>         | rs4244285 - G/A        | Synonymous variant              | Pro227Pro            |
|                |                        |                        | <u>rs12248560 - C/T</u>         | 2KB Upstream Variant |
| Phase II       | <i>COMT</i>            | <u>rs165599 - A/G</u>  | 3 Prime UTR Variant             |                      |
|                |                        | rs4680 - G/A           | Missense Variant                | Val158Met            |
|                | <i>GSTP1</i>           | rs1695 - A/G           | Missense Variant                | Ile105Val            |
|                | <i>NAT2</i>            | rs1801280 - T/C        | Missense Variant                | Ile114Thr            |
|                |                        | <u>rs1799930 - G/A</u> | Missense Variant                | Arg197Gln            |
|                |                        | <u>rs1208 - A/G</u>    | Missense Variant                | Arg268Lys            |
|                | <i>UGT1A1</i>          | rs4124874 - T/G        | Intron Variant                  |                      |
|                | <i>UGT2B7</i>          | rs7662029 - G/A        | Intron Variant                  |                      |
|                |                        | rs7668258 - C/T        | Intron Variant                  |                      |
|                | <i>UGT1A6</i>          | rs2070959 - A/G        | Missense Variant                | Thr181Ala            |
| <i>UGT1A10</i> | rs6759892 - T/G        | Missense Variant       | Ser158Ala                       |                      |
| Phase III      | <i>ABCB1</i>           | <u>rs2032582 - A/C</u> | Missense Variant                | Ser893Thr            |
|                |                        | rs1128503 - G/A        | Synonymous variant              | Gly412Gly            |
|                | <i>ABCC2</i>           | rs2273697 - G/A        | Missense Variant                | Val417Ile            |
|                |                        | rs3740066 - C/T        | Synonymous variant              | Ile1324Ile           |
|                | <i>ABCG2</i>           | rs2231142 - G/T        | Missense Variant                | Gln141Lys            |
|                | <i>SLC15A2</i>         | rs2257212 - C/T        | Missense Variant                | Leu350Phe            |
|                |                        | rs1143671 - C/T        | Missense Variant                | Pro409Ser            |
|                |                        | <u>rs1143672 - G/A</u> | Missense Variant                | Arg509Lys            |
|                | <i>SLC22A2</i>         | rs316019 - C/A         | Missense Variant                | Ala270Ser            |
|                |                        | rs316019 - C/A         | Missense Variant                | Ser270Ala            |
|                | <i>SLCO1B1</i>         | rs4149056 - T/C        | Missense Variant                | Val174Ala            |
| <i>SLCO1B3</i> | rs4149117 - G/T        | Missense Variant       | Ser112Ala                       |                      |
|                | <u>rs7311358 - A/G</u> | Missense Variant       | Met233Ile                       |                      |
| Others*        | <i>DPYD</i>            | rs1801265 - A/G        | Missense Variant                | Cys29Arg             |
|                | <i>ITGB3</i>           | rs5918 - T/C           | Missense Variant                | Leu59Pro             |
|                | <i>PGTS1</i>           | rs5788 - C/A           | Synonymous Variant              | Gly213Gly            |
|                |                        | rs10306114 - A/G       | 5 Prime UTR Variant             |                      |
|                | <i>PTGS2</i>           | <u>rs20417 - C/G</u>   | 2KB Upstream Variant            |                      |

Underlined SNP were excluded from the analysis after quality control.

\* These genes and relative polymorphisms were selected because deeply studied in relation to drug response, so likely affecting the risk or the clinical evolution of several diseases.

**Table S2.** Multinomial logistic analysis for multivariate genetic associations.

|               | Gene          | *Comparison 1                |         | Comparison 2                 |         | Comparison 3                 |         |
|---------------|---------------|------------------------------|---------|------------------------------|---------|------------------------------|---------|
|               |               | (Age class 2 vs Age class 1) |         | (Age class 3 vs Age class 1) |         | (Age class 3 vs Age class 2) |         |
|               |               | 65-89 years vs <65 years     |         | 90+ vs <65 years             |         | 90+ vs 65-89 years           |         |
|               |               | OR (95% CI)                  | P-value | OR (95% CI)                  | P-value | OR (95% CI)                  | P-value |
| rs3745274-G/T | <i>CYP2B6</i> | 1.09 (0.70-1.67)             | 0.702   | 0.62 (0.39-0.99)             | 0.045   | 0.54 (0.34-0.84)             | 0.006   |
| rs776746-G/A  | <i>CYP3A5</i> | 1.03 (0.46-2.26)             | 0.946   | 1.86 (0.88-3.91)             | 0.101   | 1.93 (0.93-4.00)             | 0.075   |
| rs4680-G/A    | <i>COMT</i>   | 1.39 (0.84-2.32)             | 0.197   | 2.56 (1.56-4.21)             | <0.001  | 1.93 (1.20-3.10)             | 0.007   |
| rs2273697-G/A | <i>ABCC2</i>  | 0.97 (0.62-1.53)             | 0.914   | 1.28 (0.80-2.03)             | 0.30    | 1.30 (0.83-2.05)             | 0.253   |

\*In each comparison the youngest group was considered as the reference category.

CI = Confidence interval. For both the comparisons 1 and 2 (both using the youngest group as reference category), Odd ratios (ORs) were obtained directly from the equations included in the models; for the comparison 3 (90+ years vs <65 years), ORs were obtained by difference of equations included in the models.
